# Supplementary material
Source: PubMed Central journal article supplement (PMC9749244)
Supplement: NIHPP2020.12.20.423533v2-supplement-1.pdf [file NIHPP2020.12.20.423533v2-supplement-1.pdf]

Supplemental Figure 1, related to Figure 1

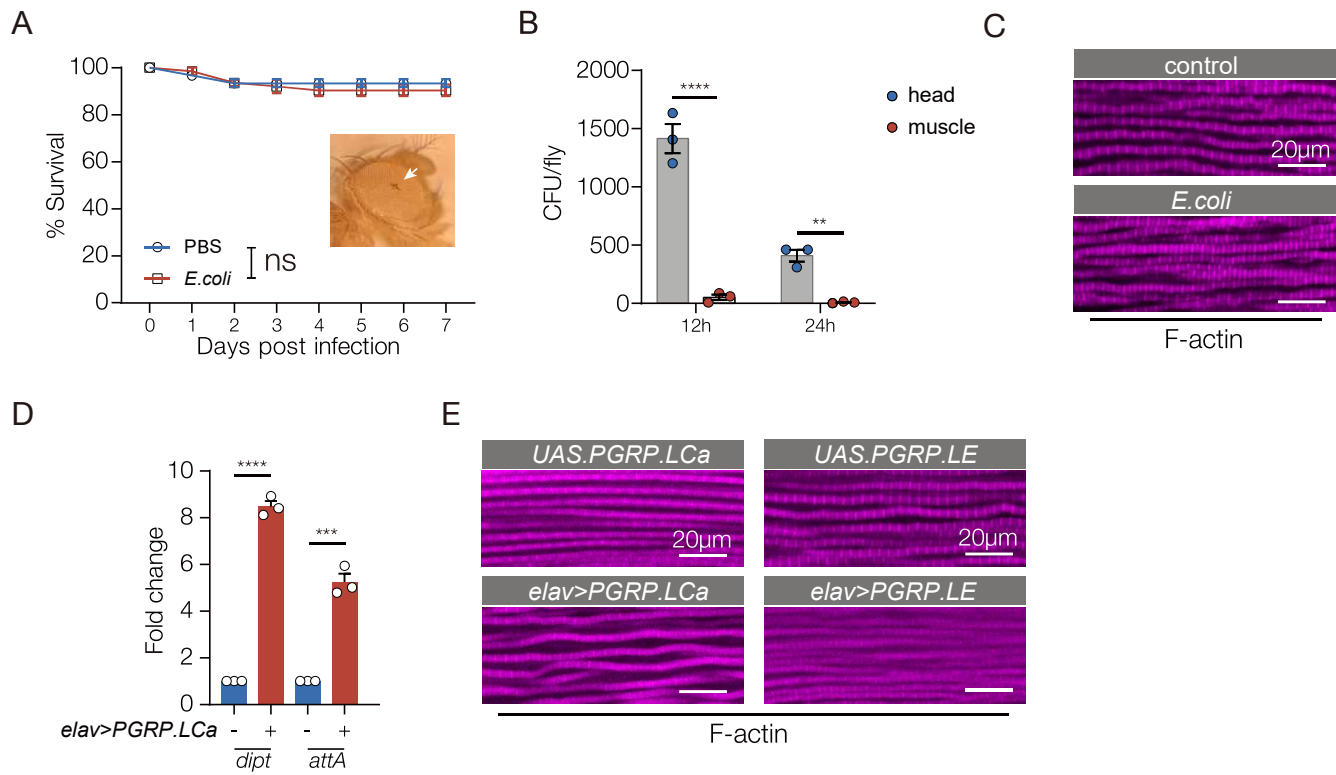

**Figure S1. Related to Figure 1. A.** Survival curve. Sterile-injected (PBS, control) and *E. coli* injected flies showed comparable longevity. White arrow shows the injection site. n=3 cohorts per genotype, with n≥20 flies per cohort. **B.** Colony forming unit (CFU) assay. Bacterial load in the brain dramatically decreased between 12- and 24- hours after *E. coli* injection. Muscle showed minimal bacterial infection. Each data point represents one biological replicate, with n=5 flies per replicate. **C.** Confocal micrographs of indirect flight muscle stained with phalloidin to visualize F-actin (violet). Muscle morphology was comparable between sterile-injected (PBS, control) and *E. coli* injected flies. **D.** qRT-PCR. Transcripts encoding the antimicrobial peptides *Dipt* and *attA* in the brain was enriched in *elav>PGRPLCa* flies compared to controls (*UAS.PGRPLCa*). Data points represent independent biological replicates, with n≥10 flies per cohort. **E.** Confocal micrographs of indirect flight muscle stained with phalloidin to visualize F-actin (violet). Muscle morphology was comparable among *elav>PGRPLCa* flies, *elav>PGRPLE* flies, and controls (*UAS.PGRPLCa*, *UAS.PGRPLE*). Significance was determined by Kaplan–Meier tests (A), or two-way ANOVA (B, D). Error bars represent SEM. (\*) p< 0.05, (\*\*) p< 0.01, (\*\*\*) p< 0.001, (\*\*\*\*) p < 0.0001, (ns) non-significant.

Supplemental Figure 2, related to Figure 2

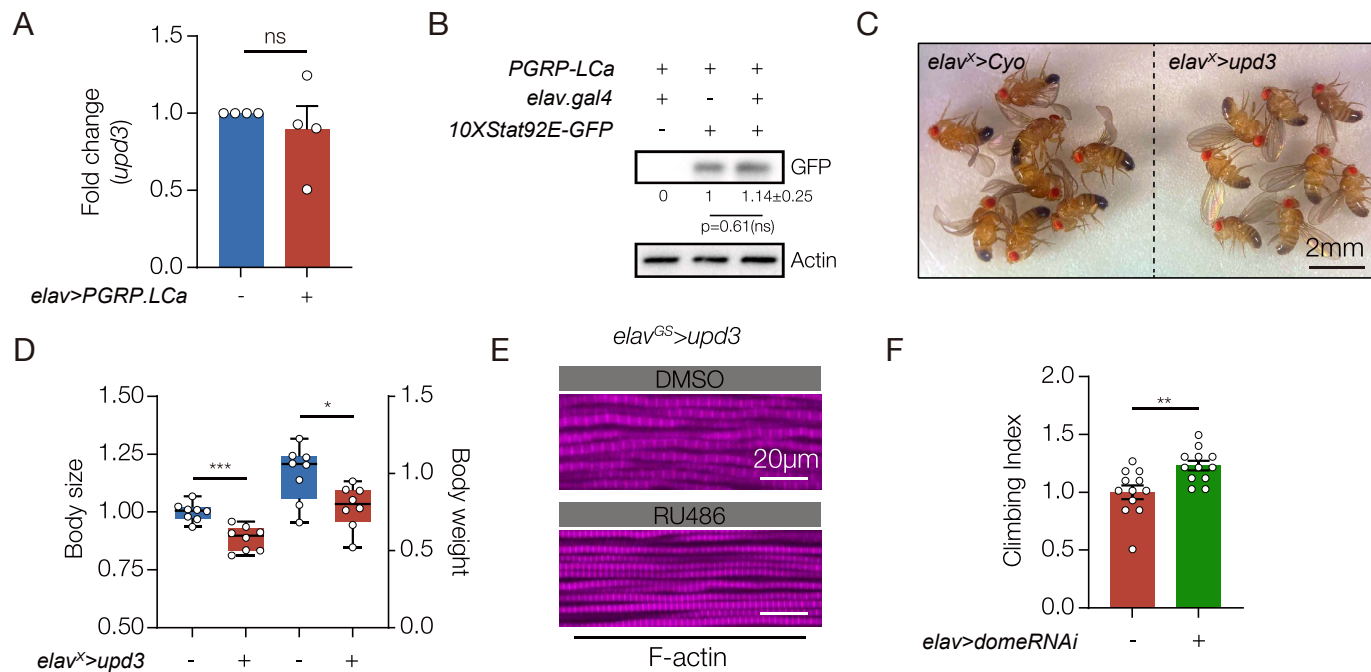

**Figure S2. Related to Figure 2.** **A.** qRT-PCR. Flies that expressed PGRP in the CNS (*elav>PGRP.LCa*) showed similar levels of *upd3* mRNA in the brain as control flies. **B.** Western blot. GFP expression from the JAK/Stat activity reporter *10XStat92E.GFP* in muscle was similar between control and *elav>PGRP.LCa* flies. Relative expression was determined for three biological replicates. **C.** Micrographs of adult flies 3-5 days after eclosion. *elav<sup>X</sup>>upd3* flies were smaller than controls. **D.** Normalized body size (left Y axis) and body weight (right Y axis) of control and *elav<sup>X</sup>>upd3* flies. **E.** Confocal micrographs of indirect flight muscles stained with phalloidin to visualize F-actin (violet). *elav<sup>GS</sup>>upd3* flies treated with RU486 or DMSO showed similar myofiber morphology **F.** Climbing index. *dome<sup>RNAi</sup>* was used to knock down Dome expression in skeletal muscle of *E. coli* infected flies. Infected flies with reduced Dome expression (*Mef2>dome<sup>RNAi</sup>*) showed improved climbing capacity compared to controls at 2 dpi. Significance was determined by two-sided unpaired student's t-test. For qRT-PCR, data points represent biological replicates, with  $n \geq 10$  flies per cohort. See Fig. 1 legend for Climbing Index data points. Error bars represent SEM. (\*)  $p < 0.05$ , (\*\*)  $p < 0.01$ , (\*\*\*)  $p < 0.001$ , (\*\*\*\*)  $p < 0.0001$ , (ns) non-significant.

Supplemental Figure 3, related to Figure 4

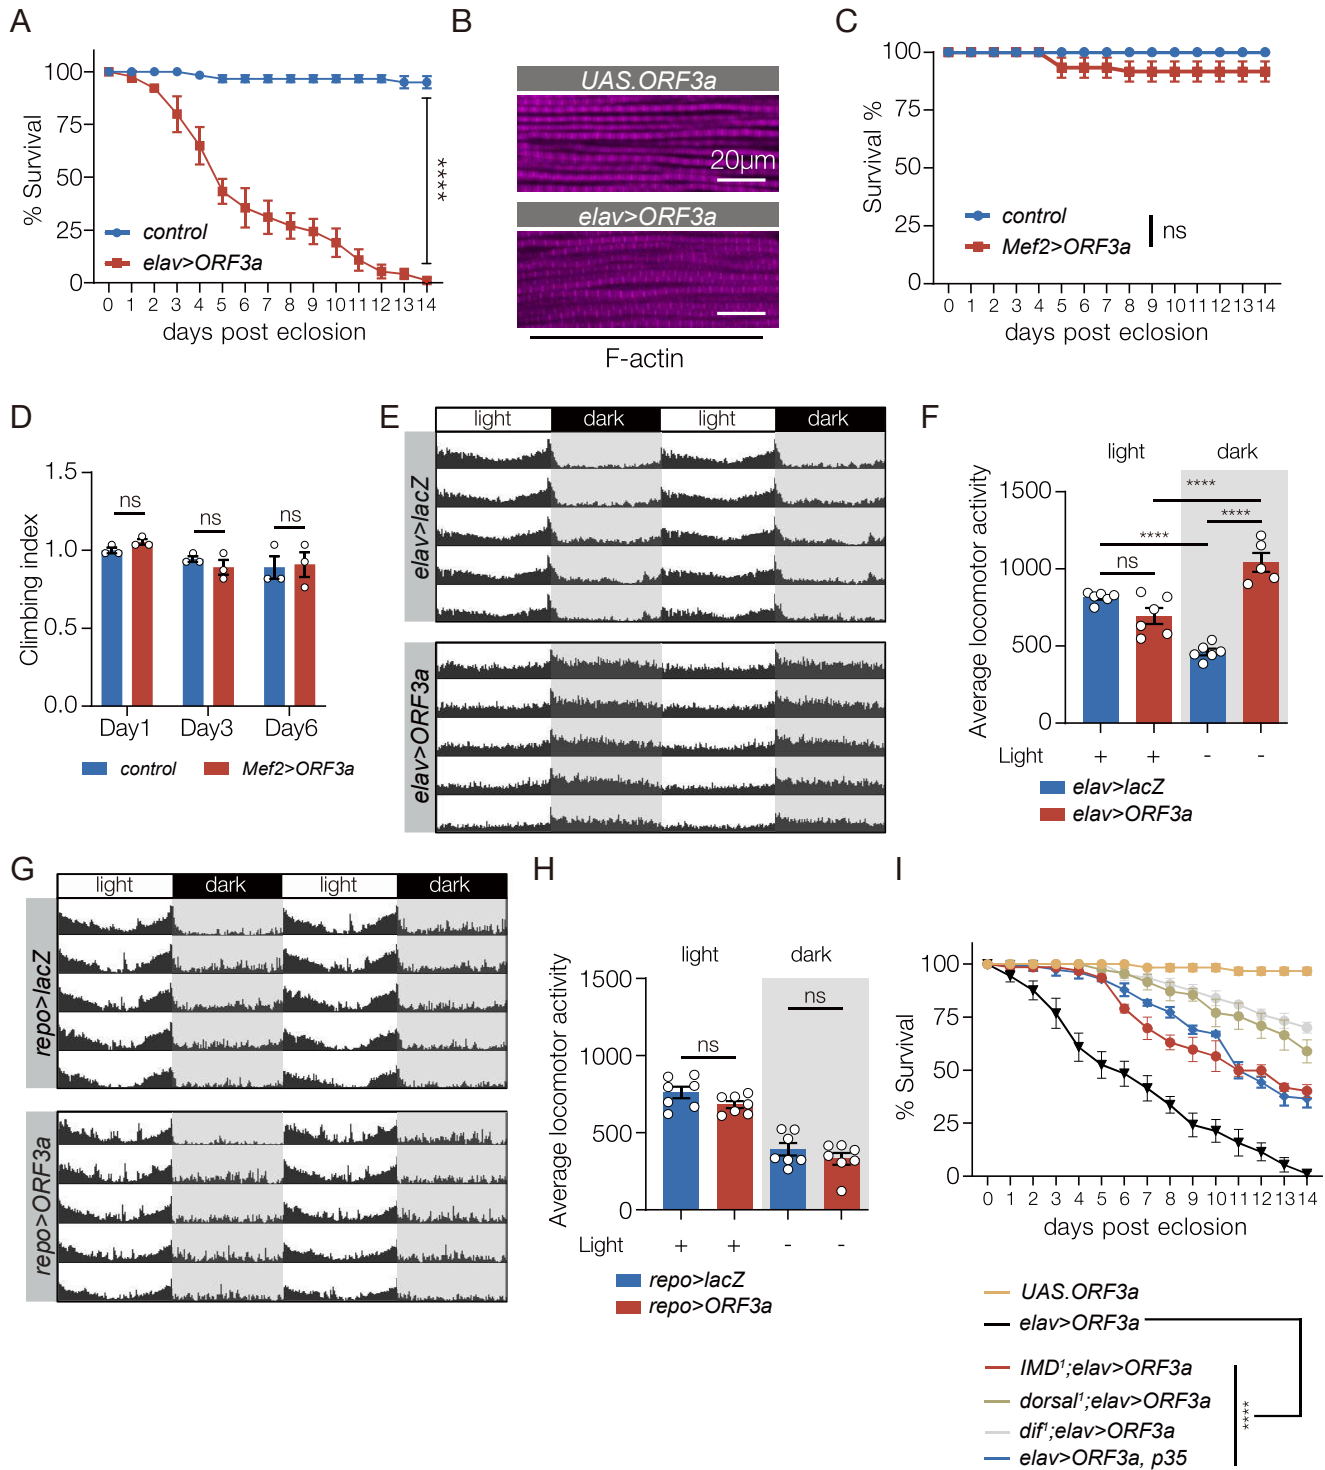

### Figure S3 Related to Figure 4.

**A.** Survival curves. *elav>ORF3a* flies showed a significant reduction in longevity compared to control flies (*UAS.ORF3a*). n=5 cohorts per genotype, with n≥20 flies per cohort. **B.** Confocal micrographs of indirect flight muscles stained with phalloidin to visualize F-actin (violet). *elav>ORF3a* flies and control flies (*UAS.ORF3a*) showed similar myofiber morphology. **C.** Survival curve. *Mef2>ORF3a* flies and control flies (*UAS.ORF3a*) showed comparable longevity. n=3 cohorts per genotype, with n≥20 flies per cohort. **D.** Climbing index. *Mef2>ORF3a* flies and control flies (*UAS.ORF3a*) showed similar climbing capacity at 1-, 3-, and 6-days after eclosion. **E,G.** Actograms. Average activity of flies over 2-days is shown. **E.** Flies that expressed ORF3a broadly in the CNS (*elav>ORF3a*) flies were more active in dark cycles than control flies (*elav>lacZ*). **F.** Quantification of data shown in E. n = 28 flies per each genotype. **G.** Flies that expressed ORF3a only in glial cells (*repo>ORF3a*) flies showed similar activity in light and dark cycles as control flies (*repo>lacZ*). **H.** Quantification of data shown in G. n = 16 flies per each genotype. **I.** Survival curves. *elav>ORF3a* flies with homozygous mutations affecting the IMD pathway (*IMD<sup>1</sup>*) or the Toll pathway (*dorsal<sup>1</sup>, dif<sup>1</sup>*) showed improved longevity compared to *elav>ORF3a* flies. *elav>ORF3a* flies that expressed the inhibitor of apoptosis p35 in the CNS also showed improved longevity compared to *elav>ORF3a* flies. n=3 cohorts per genotype, with n≥20 flies per cohort. Significance was determined by Kaplan–Meier test (A, C, I), and two-way ANOVA (D, F, H). Data represent the average of at least three independent tests. Error bars represent SEM. (\*\*\*\*) p < 0.0001, (ns) not significant.

Supplemental Figure 4, related to Figure 5

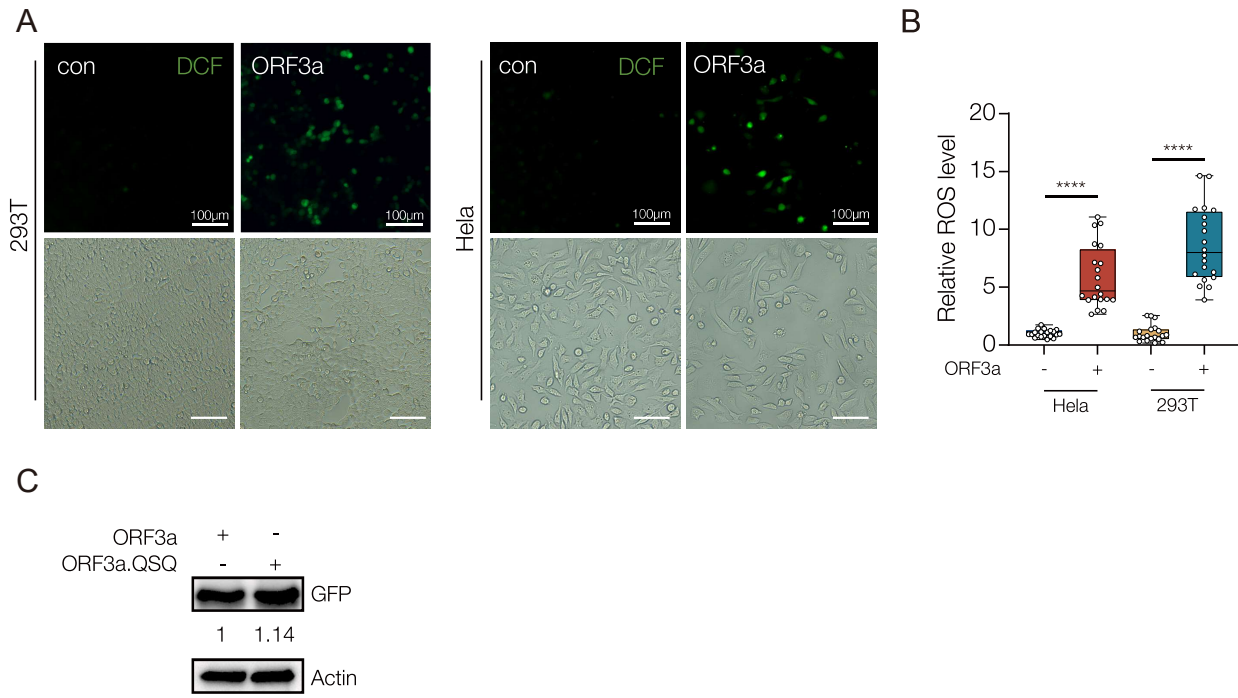

**Figure S4 Related to Figure 5.**

**A.** ROS assay. H2DCFDA was used to measure ROS in cultured cells. Micrographs of DCF fluorescence (green) in HEK293T cells (left) and HeLa cells (right) transfected with wild-type ORF3a. ORF3a transfected cells produced more ROS than untransfected controls. **B.** Quantification of ROS levels shown in A. Data points represent fluorescence in a single cell normalized to control cells. n=5 fields **C.** Western blot. HEK293T cells transfected with wild-type ORF3a and ORF3a.QSQ showed similar levels of ORF3a protein expression. Significance was determined by two-sided unpaired student's t-test (B). Error bars represent SEM. (\*\*\*\*)  $p < 0.0001$ .



Supplemental Figure 5, related to Figure 6

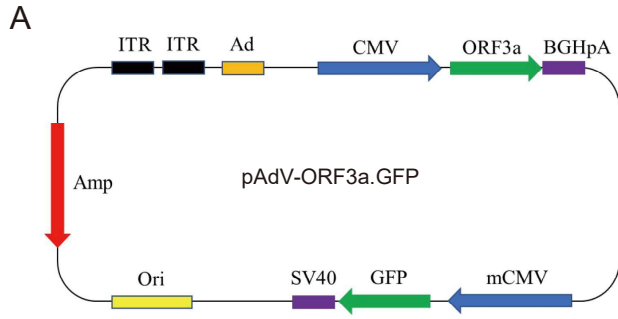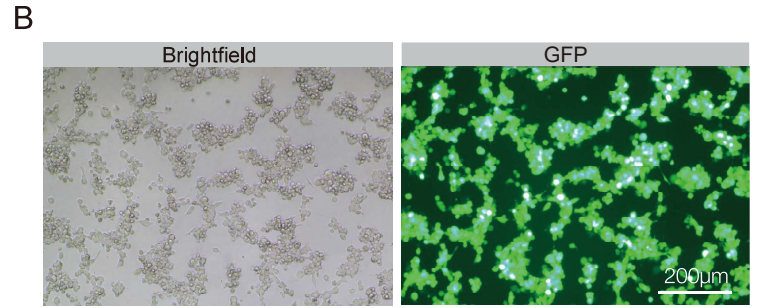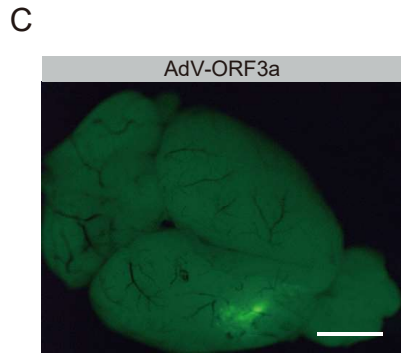

**Figure S5 Related to Figure 6.**

**A.** Vector map of AdV-ORF3a.GFP. **B.** Micrograph of HEK293 cells transduced with AdV-ORF3a.GFP. Transduced cells expressed ORF3a.GFP. **C.** Micrograph of a whole mount brain after retro-orbital injection of AdV-ORF3a.GFP. Transduced neural tissue expressed ORF3a.GFP.



**Figure S6 Related to Figure 7.**

**A.** Forest plot depicting IL-6 levels in AD patients. Squares represent the odds ratio and horizontal lines show the 95% confidence intervals. The solid vertical line corresponds to no effect. The red diamond shows the summary measure, indicating the serum levels of IL-6 were increased in AD patients (n=585) compared to health controls (n=439). **B.** Confocal micrographs of indirect flight muscle stained with phalloidin to visualize F-actin (violet). Muscle morphology was comparable between control (*elav>Gal4*) and *elav>A $\beta$ 42* flies.
